# Supplementary material for: Outcomes of patients with advanced cancer and KRAS mutations in phase I clinical trials
Source: PubMed Central journal article supplement (PMC4253408; doi:10.18632/oncotarget.2339), 2014-08-10
Supplement: oncotarget-05-8937-s001.pdf [file oncotarget-05-8937-s001.pdf]

## Outcomes of patients with advanced cancer and *KRAS* mutations in phase I clinical trials

### Supplementary Material

Supplemental Table 1: Survival analysis of patients with *KRAS* mutations

| Phase I Prognostic Characteristics                | Univariate Analysis |             |                   | Multivariate Analysis |                   |
|---------------------------------------------------|---------------------|-------------|-------------------|-----------------------|-------------------|
|                                                   | Patients, n         | Median OS   | p-value           | HR (95%)              | p-value           |
| <b>Number of prior therapies</b>                  |                     |             | 0.48              |                       |                   |
| 0-3                                               | 191                 | 8 (7, 11)   |                   | 1.0                   |                   |
| >3                                                | 174                 | 8 (7, 10)   |                   | 1.2 (0.9, 1.6)        | 0.17              |
| <b>Number of metastatic sites</b>                 |                     |             | <b>&lt;0.0001</b> |                       |                   |
| ≤2                                                | 233                 | 10 (8, 13)  |                   | 1.0                   |                   |
| >2                                                | 132                 | 7 (5, 8)    |                   | 1.6 (1.2, 2.1)        | <b>0.001</b>      |
| <b>ECOG-PS</b>                                    |                     |             | <b>&lt;0.0001</b> |                       |                   |
| 0                                                 | 109                 | 12 (11,15)  |                   | 1.0                   |                   |
| 1                                                 | 219                 | 7 (6, 8)    |                   | 1.5 (1.1, 2.1)        | <b>0.006</b>      |
| 2,3                                               | 33                  | 3 (2, 7)    |                   | 3.2 (2.0, 5.2)        | <b>&lt;0.0001</b> |
| <b>Albumin</b>                                    |                     |             | <b>&lt;0.0001</b> |                       |                   |
| <3.5                                              | 74                  | 5 (4, 6)    |                   | 1.0                   |                   |
| ≥3.5                                              | 285                 | 10 (8, 12)  |                   | 0.5 (0.4, 0.7)        | <b>&lt;0.0001</b> |
| <b>LDH</b>                                        |                     |             | <b>&lt;0.0001</b> |                       |                   |
| ≤618                                              | 200                 | 12 (10, 15) |                   | 1.0                   |                   |
| >618                                              | 160                 | 6 (5, 7)    |                   | 2.0 (1.5, 2.6)        | <b>&lt;0.0001</b> |
| <b>Platelets</b>                                  |                     |             | <b>0.07</b>       |                       |                   |
| ≤ 400,000                                         | 346                 | 8 (7, 10)   |                   | 1.0                   |                   |
| > 400,000                                         | 17                  | 5 (3, NR)   |                   | 1.7 (0.9, 3.1)        | 0.09              |
| <b>Gastrointestinal tumors</b>                    |                     |             | <b>0.006</b>      |                       |                   |
| No                                                | 103                 | 12 (8, 15)  |                   | 1.0                   |                   |
| Yes                                               | 269                 | 8 (7, 9)    |                   | 1.2 (0.8, 1.6)        | 0.33              |
| <b>Number of associated molecular alterations</b> |                     |             | <b>0.01</b>       |                       |                   |
| 0                                                 | 256                 | 8 (7, 9)    |                   | 1.0                   |                   |
| 1                                                 | 72                  | 8 (6, 13)   |                   | 0.7 (0.5, 1.0)        | <b>0.03</b>       |
| ≥2                                                | 37                  | 17(11, NR)  |                   |                       |                   |
| <b>Mutation type</b>                              |                     |             | 0.42              |                       |                   |
| G12A                                              | 25                  | 5 (4, 16)   |                   | 1.0                   |                   |
| G12C                                              | 41                  | 8 (6, 16)   |                   | 0.6 (0.3, 1.1)        | <b>0.08</b>       |
| G12D                                              | 106                 | 8 (6, 10)   |                   | 0.7 (0.4, 1.2)        | 0.22              |
| G12V                                              | 80                  | 9 (8, 11)   |                   | 0.5 (0.3, 0.8)        | <b>0.008</b>      |
| G13D                                              | 40                  | 7 (4, 28)   |                   | 0.6 (0.3, 1.1)        | 0.11              |
| Other                                             | 64                  | 10 (7, 15)  |                   | 0.6 (0.3, 1.0)        | <b>0.04</b>       |

LDH: lactate dehydrogenase, ECOG: eastern cooperative oncology group, OS: overall survival
